# Supplementary material
Source: publisher figshare collection journal article supplement (https://tandf.figshare.com/ndownloader/files/17824538)
Supplement: Supplementary file 1 [file 17824538]

Supporting information


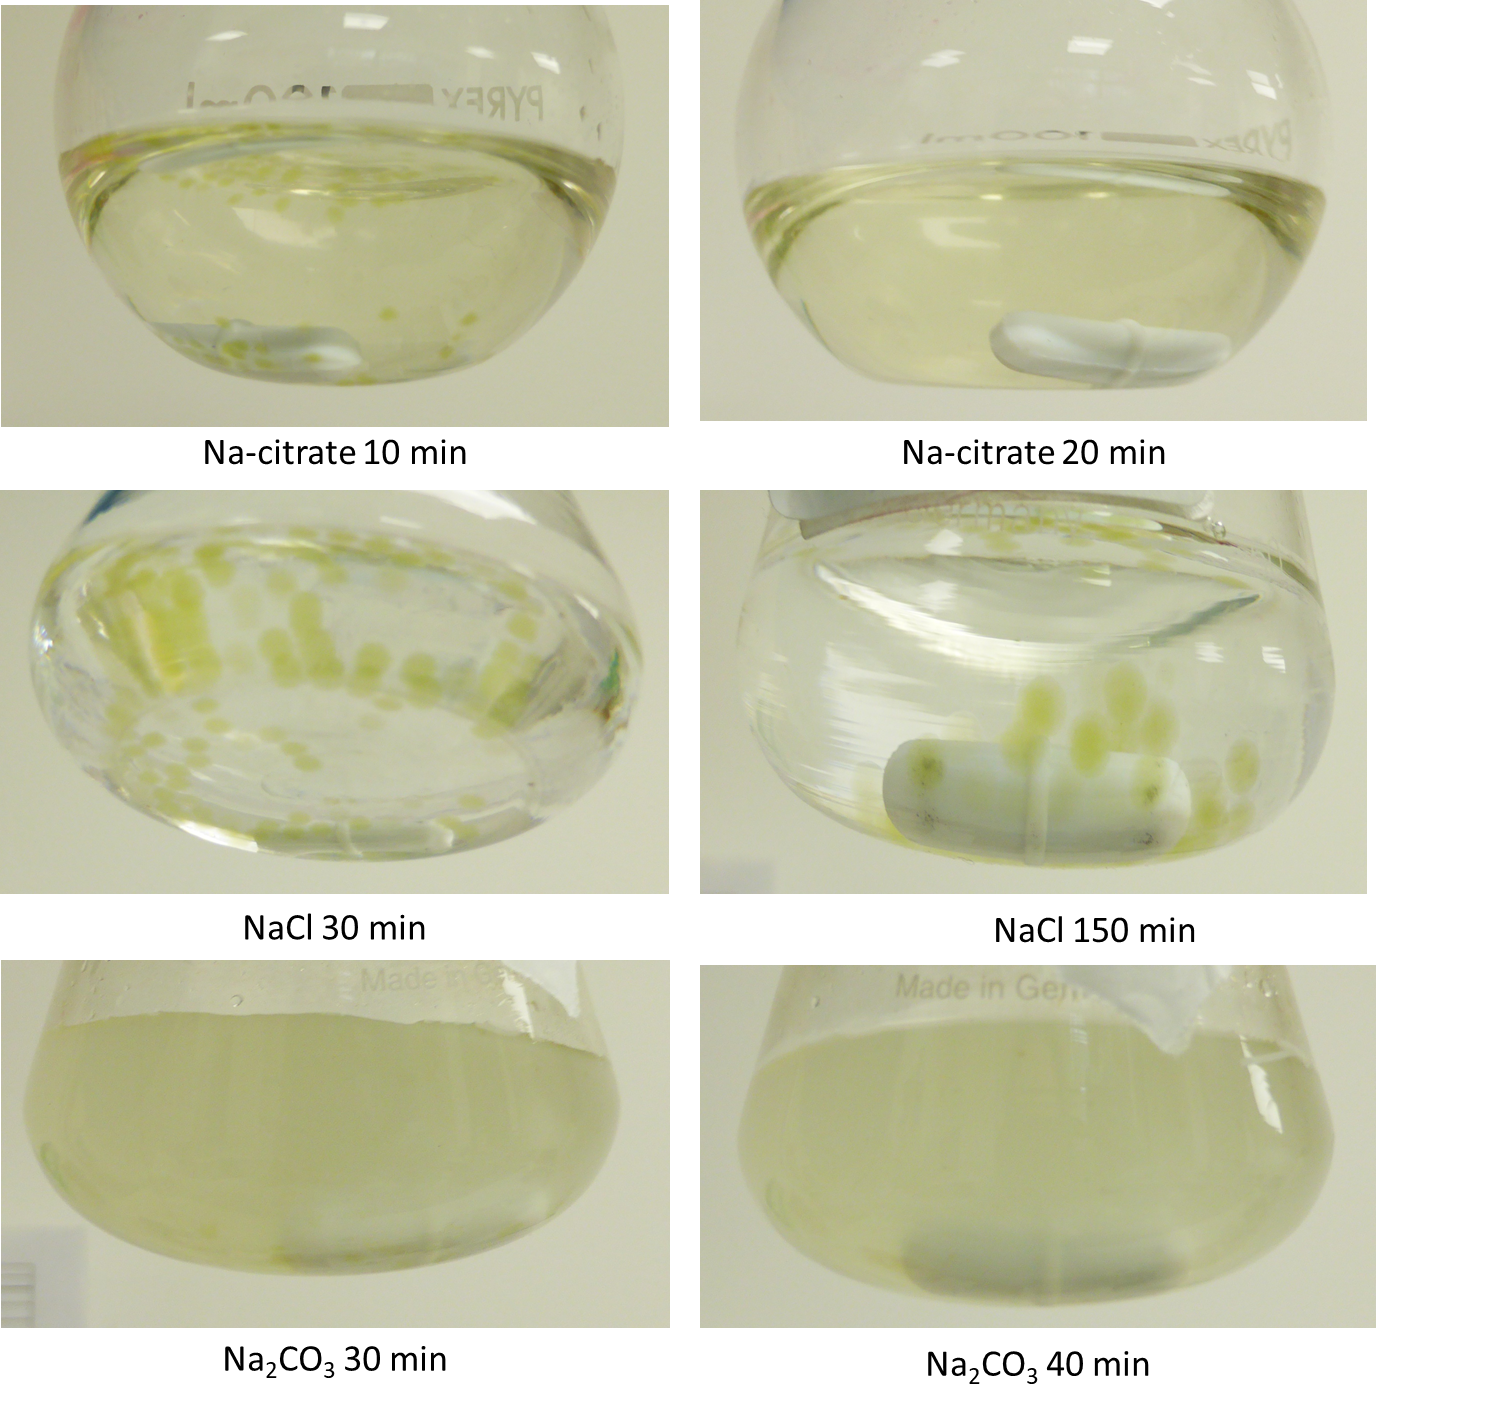


Figure S.1. Algae beads in respective dissolution solutions.


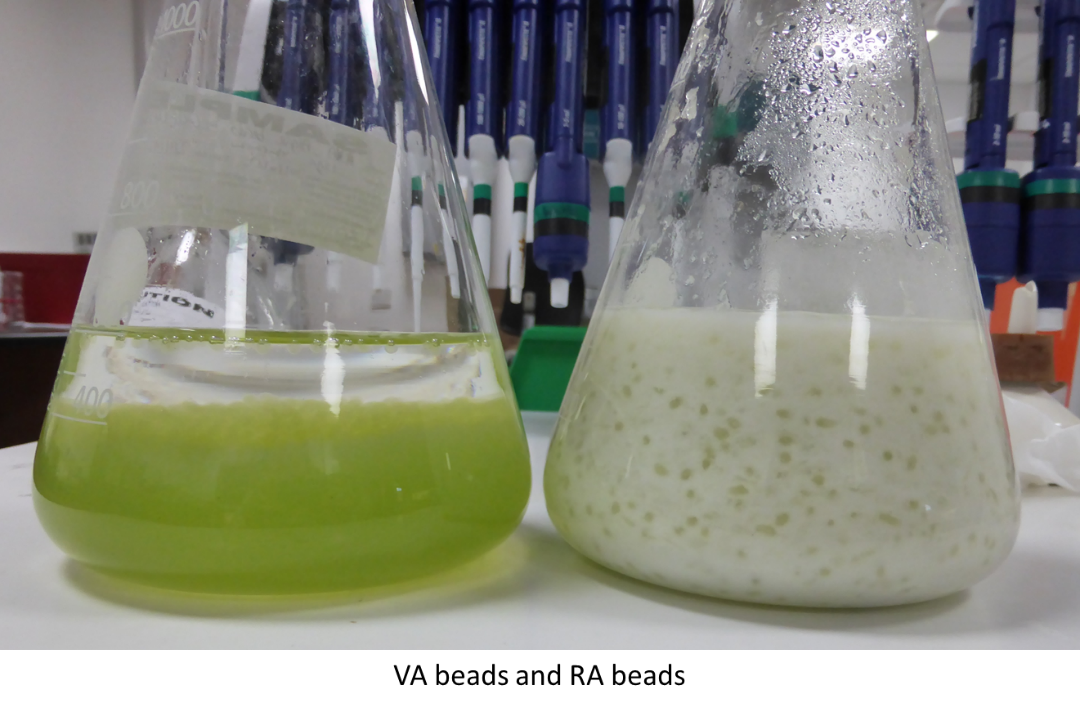


Figure S.2. Algae beads made from VA (left) and RA (right) after stirring.
